# Supplementary material
Source: Springer Nature journal article supplement (https://www.springermedizin.de/resource/supplementary/12955_2011_899_MOESM1_ESM.pdf/9558662)
Supplement: MOESM1 [file 9558662]

Caregiving  
situation

Caregiver  
factors

Environmental  
factors

Quality of  
life

```
graph LR; A([Caregiving situation]) --> D[Quality of life]; B([Caregiver factors]) --> D; C([Environmental factors]) --> D;
```
